# Supplementary material for: Clear-cut observation of PNA invasion using nanomechanical DNA origami devices
Source: Royal Society of Chemistry journal article supplement (doi:10.1039/c2cc36358e), 2012-01-01
Supplement: c2cc36358e.pdf [file c2cc36358e.pdf]

**Supporting Information for “Clear-cut Observation of PNA Invasion using Nanomechanical DNA Origami Devices” by Takahiro Yamazaki, Yuichiro Aiba, Kohei Yasuda, Yusuke Sakai, Yusei Yamanaka Akinori Kuzuya\*, Yuichi Ohya and Makoto Komiyama\***

**Detailed Experimental Procedures**

**Materials.** Staple DNA strands were purchased from Sigma Genosys (Japan) or Hokkaido System Science Co., Ltd. (Japan) then used without further purification.

**Synthesis of bis-PNA.** The bis-PNA was synthesized by Boc chemistry, purified by reversed-phase HPLC, and characterized by MALDI-TOF mass spectrometry (Bruker, AutoFLEX). The detailed protocols were described elsewhere.

**Preparation of nanomechanical DNA origami devices.** Formation of nanomechanical DNA origami was performed with M13mp18 ssDNA (4 nM, Takara, Japan), staples and zipper elements (16 nM for each strand) in a solution containing Tris (40 mM), acetic acid (20 mM), EDTA (10 mM), and magnesium acetate (12.5 mM, 1 X TAE/Mg buffer, 100  $\mu$ L). This mixture was cooled from 90°C to 25°C at a rate of -1.0°C/min using a PCR thermal cycler to anneal the strands.

**Induction of shape transition by PNA invasion.** Annealed mixture of nanomechanical DNA origami devices (100 $\mu$ L) was ultrafiltrated by using an ultrafiltration microtube (Amicon Ultra 0.5 mL-100K, Millipore, Ireland) to remove excess staples and zipper elements, and to exchange the buffer of the sample to 1 X HEPES/Mg buffer containing HEPES (5 mM) and magnesium acetate (12.5 mM). After 0 or 1000 eq. of bis-PNA to the four zipper elements on nanomechanical DNA origami devices (final concentration, 4 nM) was added to the solution, the mixture was incubated at 16°C for 1day.

**AFM imaging.** AFM imaging was performed on a SPA-300HV system (SII). A mixture containing DNA origami devices and bis-PNA (1 $\mu$ L) was mixed with 1 X TAE/Mg buffer (5 $\mu$ L) and left for several minutes, then deposited on freshly cleaved mica and additional 1 X TAE/Mg buffer (100  $\mu$ L) was added. Imaging was performed in the fluid DFM scanning mode with a BL-AC40TS tip (Olympus). DNA origami devices in an image were counted as the cross form, when both of the ends were clearly separated AND the levers around the fulcrum were clearly not laid in parallel. They were counted as the parallel form when at least one of the ends was clearly identified to be in head-to-head (the end of a lever close to the concavity) or tail-to-tail (the opposite end of the lever) contact, or into antiparallel form when head-to-tail contact was clearly observed for at least one of the ends. Devices not in any of the above conditions were counted as unclear motifs.

**Agarose gel electrophoresis.** Agarose gel electrophoresis was carried out on an ice bath using 1.5% agarose gel containing 1 X TAE/Mg buffer under following conditions; 50V, 2.5h. The gel was stained with GelStar (FMC Bioproducts, ME, USA) and imaged on a Typhoon FLA-7000 (GE Healthcare, UK).

**Table S1.** Sequence and molecular mass of bis-PNA measured by MALDI-TOF Mass Spectrometry.

|         | Sequence <sup>a)</sup>                                     | Calcd. | Found  |
|---------|------------------------------------------------------------|--------|--------|
| bis-PNA | H2N-P (Lys) CCTTTCTCTC-X <sub>3</sub> -CTCTCTTTCC (Lys) -H | 6050.8 | 6041.4 |

a) P and X indicate phosphoserine and 8-amino-3,6-dioxaoctanoic acid, respectively.

1. M. Komiyama, Y. Aiba, T. Ishizuka and J. Sumaoka, *Nat. Protoc.*, **2008**, *3*, 646–654.

**Table S2.** Counted numbers of the motifs in AFM images.

|              | Full Match |         |         | Mismatch   |         |         |
|--------------|------------|---------|---------|------------|---------|---------|
|              | Before     | Without | With    | Before     | Without | With    |
|              | Incubation | bis-PNA | bis-PNA | Incubation | bis-PNA | bis-PNA |
| Cross        | 17         | 19      | 78      | 11         | 10      | 16      |
| Antiparallel | 1          | 3       | 15      | 0          | 1       | 2       |
| Parallel     | 73         | 78      | 17      | 76         | 81      | 73      |
| Unclear      | 14         | 17      | 37      | 36         | 17      | 16      |
| Sum          | 105        | 117     | 147     | 123        | 109     | 107     |

**Table S3.** Staple strands used to form DNA origami pliers. Other staple strands are listed in the Supporting Information of ref. 8 in the main text.

|              |                                          |                   |
|--------------|------------------------------------------|-------------------|
| 65long       | TCTTAAACAGCTTGATGTGCCGTCGAGAGGGTGAGCCGCC |                   |
| 66s-PNA-S    | GTATAGCCGCTTTCGAGGTGAATTTTTCTCTCTTTCC    | Full match closer |
| 66s-PNA-SM1  | GTATAGCCGCTTTCGAGGTGAATTTTTCTCTGTTTCC    | One base mismatch |
| 69long       | ACAATGACAACAACCATAGCGGGTTTTGCTCCAGGTCAG  |                   |
| 70s-PNA-S    | GCGGATAAACCGATAGTTGCGCCGTTTTCTCTCTTTCC   | Full match closer |
| 70s-PNA-SM1  | GCGGATAAACCGATAGTTGCGCCGTTTTCTCTGTTTCC   | One base mismatch |
| 73long       | GATATATTCGGTCGCTAGGCTGAGACTCCTCACAATAAA  |                   |
| 74s-PNA-S    | ATTAGGATTCGCCCACGCATAACCTTTTTCTCTCTTTCC  | Full match closer |
| 74s-PNA-SM1  | ATTAGGATTCGCCCACGCATAACCTTTTTCTCTGTTTCC  | One base mismatch |
| 78s-PNA-S    | GTATTAAGGAGGCTTGCAAGGAGTTTTCTCTCTTTCC    | Full match closer |
| 78s-PNA-SM1  | GTATTAAGGAGGCTTGCAAGGAGTTTTCTCTGTTTCC    | One base mismatch |
| 166s-PNA-S   | GTCGAGGTAGAGATAGAACCCTTCTTTTGAAAGAGAG    | Full match closer |
| 166s-PNA-SM1 | GTCGAGGTAGAGATAGAACCCTTCTTTTGAAACAGAG    | One base mismatch |
| 169long      | GGACATTCGGCCAACGCCGTAAAGCACTAAAATCCTGTT  |                   |
| 170s-PNA-S   | CTAAAGGGCGACCAGTAATAAAAAGTTTTGAAAGAGAG   | Full match closer |
| 170s-PNA-SM1 | CTAAAGGGCGACCAGTAATAAAAAGTTTTGAAACAGAG   | One base mismatch |
| 173long      | AGATTCACCAGTCACAAGCCCCGATTTAGAGCGGTCCAC  |                   |
| 174s-PNA-S   | GGAAAGCCGATTATTTACATTGGCTTTTGAAAGAGAG    | Full match closer |
| 174s-PNA-SM1 | GGAAAGCCGATTATTTACATTGGCTTTTGAAACAGAG    | One base mismatch |
| 177long      | TCAATCGTCTGAAATGGGCGAACGTGGCGAGATCACCGCC |                   |
| 178s-PNA-S   | GAAGAAAGACCTACATTTTGACGCTTTTGAAAGAGAG    | Full match closer |
| 178s-PNA-SM1 | GAAGAAAGACCTACATTTTGACGCTTTTGAAACAGAG    | One base mismatch |
